# Supplementary material for: Root-associated fungal diversity in Central Africa’s most logged timber species (Aucoumea klaineana Pierre) suggests monodominance is independent of mycorrhizal associations
Source: Research Square preprint supplement (doi:10.21203/rs.3.rs-6261557/v1), 2025-04-11
Supplement: Supplementary file 1 [file 3c3760175bdbbf86ad636805.docx]

Supplementary Material 1: p-values from Kruskal-Wallis non-parametric tests applied to determine significant differences across Alpha diversity assessed using OTU richness, Shannon diversity index, and Pielou’s evenness index for each trophic guild in

|  |  | **Alpha diversity** | | |
| --- | --- | --- | --- | --- |
| **GABON** | | **OTU richness** | **Pielou index** | **Shannon index** |
| **Stand type** | **All** (ITS2) | 0,106 | 0,238 | 0,369 |
| **Saprotrophs** (ITS2) | 0,113 | 0,648 | 0,159 |
| **Pathotrophs** (ITS2) | 0,169 | 0,833 | 0,348 |
| **Symbiotrophs** (ITS2) | 0,139 | 0,087 | 0,107 |
| **AM fungi** (SSU) | 0,598 | 0,968 | 0,681 |
| **Tree social status** | **All** (ITS2) | 0,829 | 0,938 | 0,990 |
| **Saprotrophs** (ITS2) | 0,100 | 0,061 | **0,043* (CR)** |
| **Pathotrophs** (ITS2) | 0,695 | 0,412 | 0,947 |
| **Symbiotrophs** (ITS2) | 0,625 | 0,095 | 0,437 |
| **AM fungi** (SSU) | 0,123 | 0,296 | 0,139 |
| **DRC** | | **OTU richness** | **Pielou index** | **Shannon index** |
| **Stand type** | **All** (ITS2) | 0,133 | **0,043*  (Minkuku)** | 0,101 |
| **Saprotrophs** (ITS2) | 0,137 | 0,060 | 0,115 |
| **Pathotrophs** (ITS2) | 0,184 | 0,903 | 0,266 |
| **Symbiotrophs** (ITS2) | 0,852 | 0,817 | 0,905 |
| **AM fungi** (SSU) | 0,975 | 0,855 | 0,927 |
| **Tree social status** | **All** (ITS2) | 0,536 | 0,260 | 0,487 |
| **Saprotrophs** (ITS2) | 0,877 | 0,517 | 0,869 |
| **Pathotrophs** (ITS2) | 0,077 | 0,752 | 0,119 |
| **Symbiotrophs** (ITS2) | 0,961 | 0,724 | 0,990 |
| **AM fungi** (SSU) | 0,155 | 0,238 | 0,108 |

Supplementary Material 2: Results from permutational multivariate analyses of variance (PERMANOVA) with 9,999 permutations performed and Bray-Curtis and Jaccard distance matrices. P-values were categorized as follows: p ≤ 0.05 (significant), p ≤ 0.01 (highly significant), and p ≤ 0.001 (very highly significant).

|  |  | **Beta diversity** | |
| --- | --- | --- | --- |
| **GABON** | | **Bray-Curtis** | **Jaccard** |
| **Stand type** | **All** (ITS2) | **<0,001***** | **<0,001***** |
| **Saprotrophs** (ITS2) | **<0,001***** | **<0,001***** |
| **Pathotrophs** (ITS2) | **<0,001***** | **<0,001***** |
| **Symbiotrophs** (ITS2) | **<0,001***** | **<0,001***** |
| **AM fungi** (SSU) | **<0,001***** | **<0,001***** |
| **Tree social status** | **All** (ITS2) | 0,426 | 0,382 |
| **Saprotrophs** (ITS2) | **0,003**** | **0,001**** |
| **Pathotrophs** (ITS2) | 0,192 | 0,226 |
| **Symbiotrophs** (ITS2) | **0,008**** | **0,008**** |
| **AM fungi** (SSU) | **0,004**** | **0,004**** |
| **DRC** | | **Bray-Curtis** | **Jaccard** |
| **Stand type** | **All** (ITS2) | 0,475 | 0,454 |
| **Saprotrophs** (ITS2) | **0,043*** | **0,033*** |
| **Pathotrophs** (ITS2) | **0,005**** | **0,043*** |
| **Symbiotrophs** (ITS2) | **0,021*** | **0,031*** |
| **AM fungi** (SSU) | **0,002**** | **0,003**** |
| **Tree social status** | **All** (ITS2) | 0,097 | 0,101 |
| **Saprotrophs** (ITS2) | 0,467 | 0,475 |
| **Pathotrophs** (ITS2) | 0,737 | 0,538 |
| **Symbiotrophs** (ITS2) | 0,668 | 0,793 |
|  | **AM fungi** (SSU) | 0,629 | 0,618 |


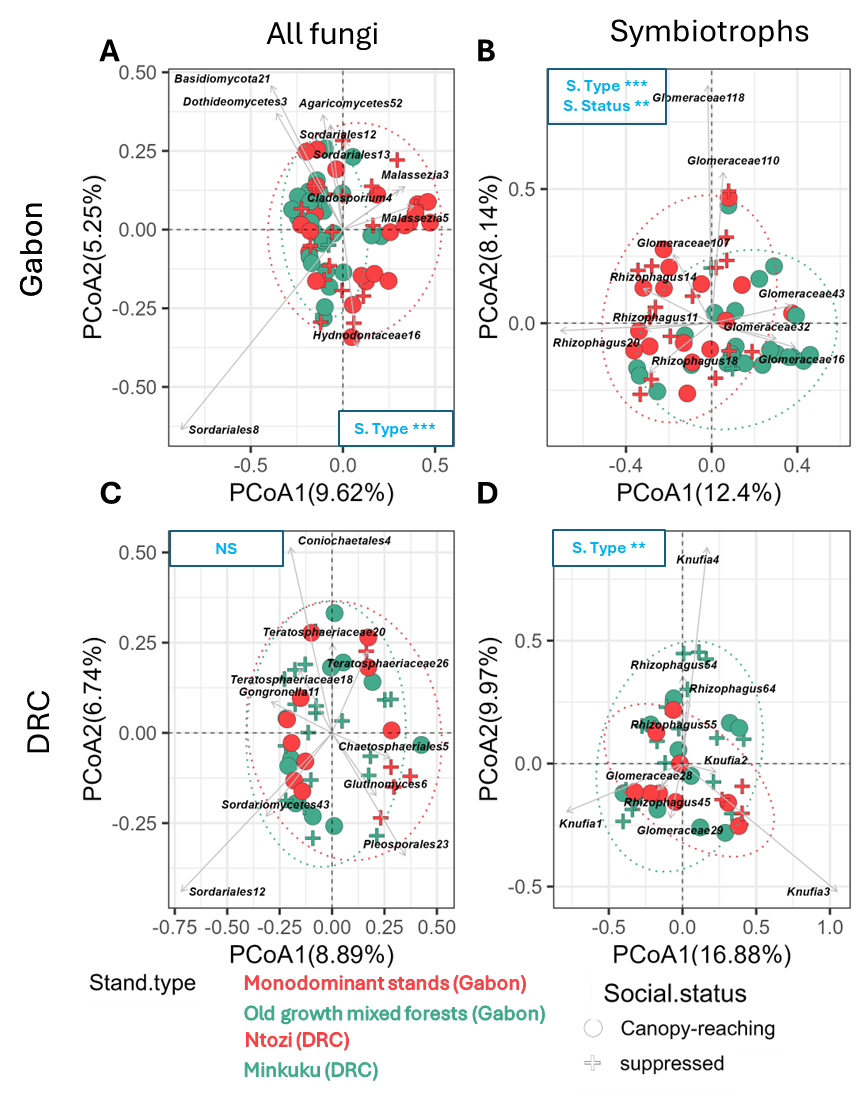


Supplementary Material 3: PCoA plots based on Bray-Curtis dissimilarity matrices on OTUs obtained from Gabon (A,B) and the DRC (C,D) assigned to every fungal OTUs (A,C), and symbiotrophic (B,C) trophic guild obtained from the ITS2 rDNA region. Significant differences between modalities were assessed using permutational multivariate analyses of variance (PERMANOVA) with 9,999 permutations. Blue labels indicate significant differences, with p-values categorized as follows: p ≤ 0.05 (significant), p ≤ 0.01 (highly significant), and p ≤ 0.001 (very highly significant). The variables "S.type" stands for stand type and "S.status" for social status. The 10 taxa that have the highest contributions to the ordinations are labelled in each plot.
